# Supplementary material for: Understanding the Relationship between Intrinsic Cardiorespiratory Fitness and Serum and Skeletal Muscle Metabolomics Profile
Source: PubMed Central journal article supplement — J Proteome Res. 2021 Apr 28;20(5):2397–409. doi: 10.1021/acs.jproteome.0c00905 (PMC8280739; doi:10.1021/acs.jproteome.0c00905), 2021-04-28
Supplement: pr0c00905_si_001.pdf [file pr0c00905_si_001.pdf]

# Understanding the relationship between intrinsic cardiorespiratory fitness and serum and skeletal muscle metabolomics profile

Alex Castro<sup>1\*</sup>, Renata G. Duft<sup>1</sup>, Lucas M. Silva<sup>1</sup>, Marina L. V. Ferreira<sup>1</sup>, André L. L. Andrade<sup>1,2</sup>,  
Celene F. Bernardes<sup>1</sup>, Cláudia R. Cavaglieri<sup>1</sup>, Mara P. T. Chacon-Mikahil<sup>1\*</sup>

<sup>1</sup> Laboratory of Exercise Physiology, School of Physical Education, University of Campinas, Campinas, 13083-851, São Paulo, Brazil.

<sup>2</sup> School of Medical Sciences, University of Campinas, Campinas, 13083-887, São Paulo, Brazil.

## \*Corresponding Author:

Alex Castro - Laboratory of Exercise Physiology, School of Physical Education, University of Campinas, Campinas, 13083-851, São Paulo, Brazil; ORCID: <https://orcid.org/0000-0002-0298-2672>; e-mail: [ax.castro@yahoo.com.br](mailto:ax.castro@yahoo.com.br); Phone: +55 19 3521-6625.

Mara P. T. Chacon-Mikahil - Laboratory of Exercise Physiology, School of Physical Education, University of Campinas, Campinas, 13083-851, São Paulo, Brazil; ORCID: <https://orcid.org/0000-0002-6109-5141>; e-mail: [marapatricia@fef.unicamp.br](mailto:marapatricia@fef.unicamp.br); Phone: +55 19 3521-6625.

## SUPPORTING INFORMATION

**Figure S1.** Representation of the serum 1D <sup>1</sup>H-NMR spectrum region where the main metabolites were quantified for a single participant. (A): Entire Spectrum; (B): Ornithine; (C): Betaine; (D): Proline; (E): Threonine; (F): Glutamine.

**Figure S2.** Representation of a skeletal muscle 1D <sup>1</sup>H-NMR spectrum region where the main metabolites were quantified for a single participant. (A): Entire Spectrum; (B): Formate; (C): Fumarate; (D): Lactate; (E): NADP<sup>+</sup>.

**Table S1.** Summary of serum and skeletal muscle pathways related to iCRF.

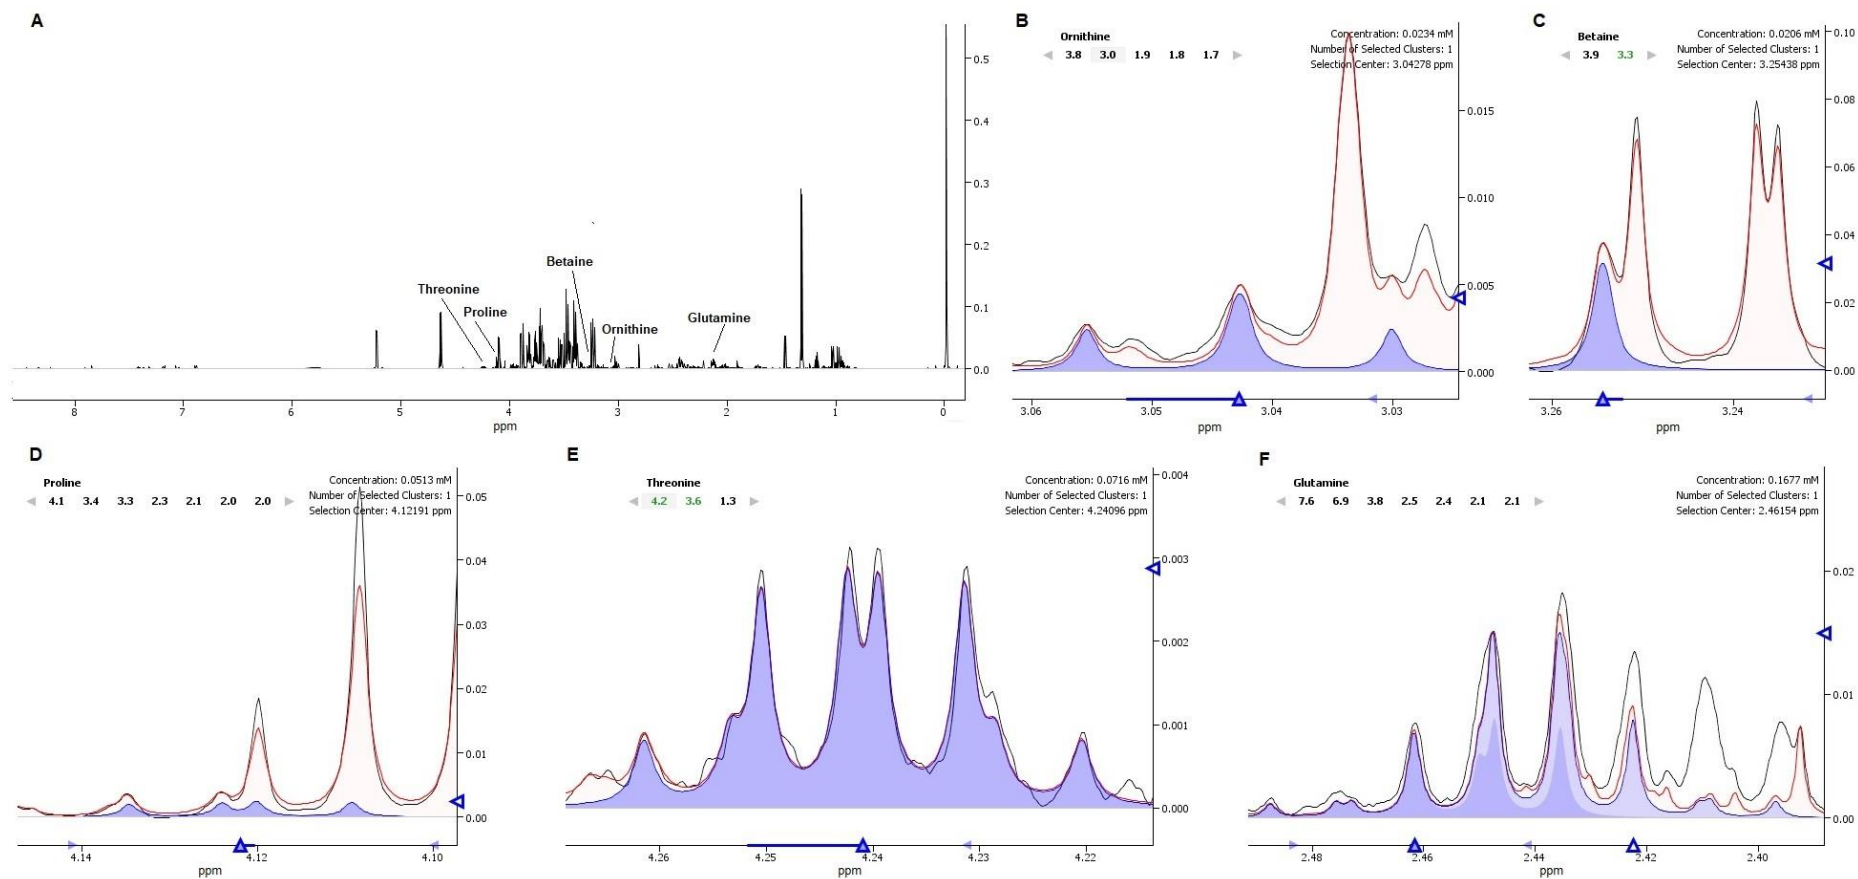

**Figure S1.** Representation of the serum 1D <sup>1</sup>H-NMR spectrum region where the main metabolites were quantified for a single participant. (A): Entire Spectrum; (B): Ornithine; (C): Betaine; (D): Proline; (E): Threonine; (F): Glutamine.

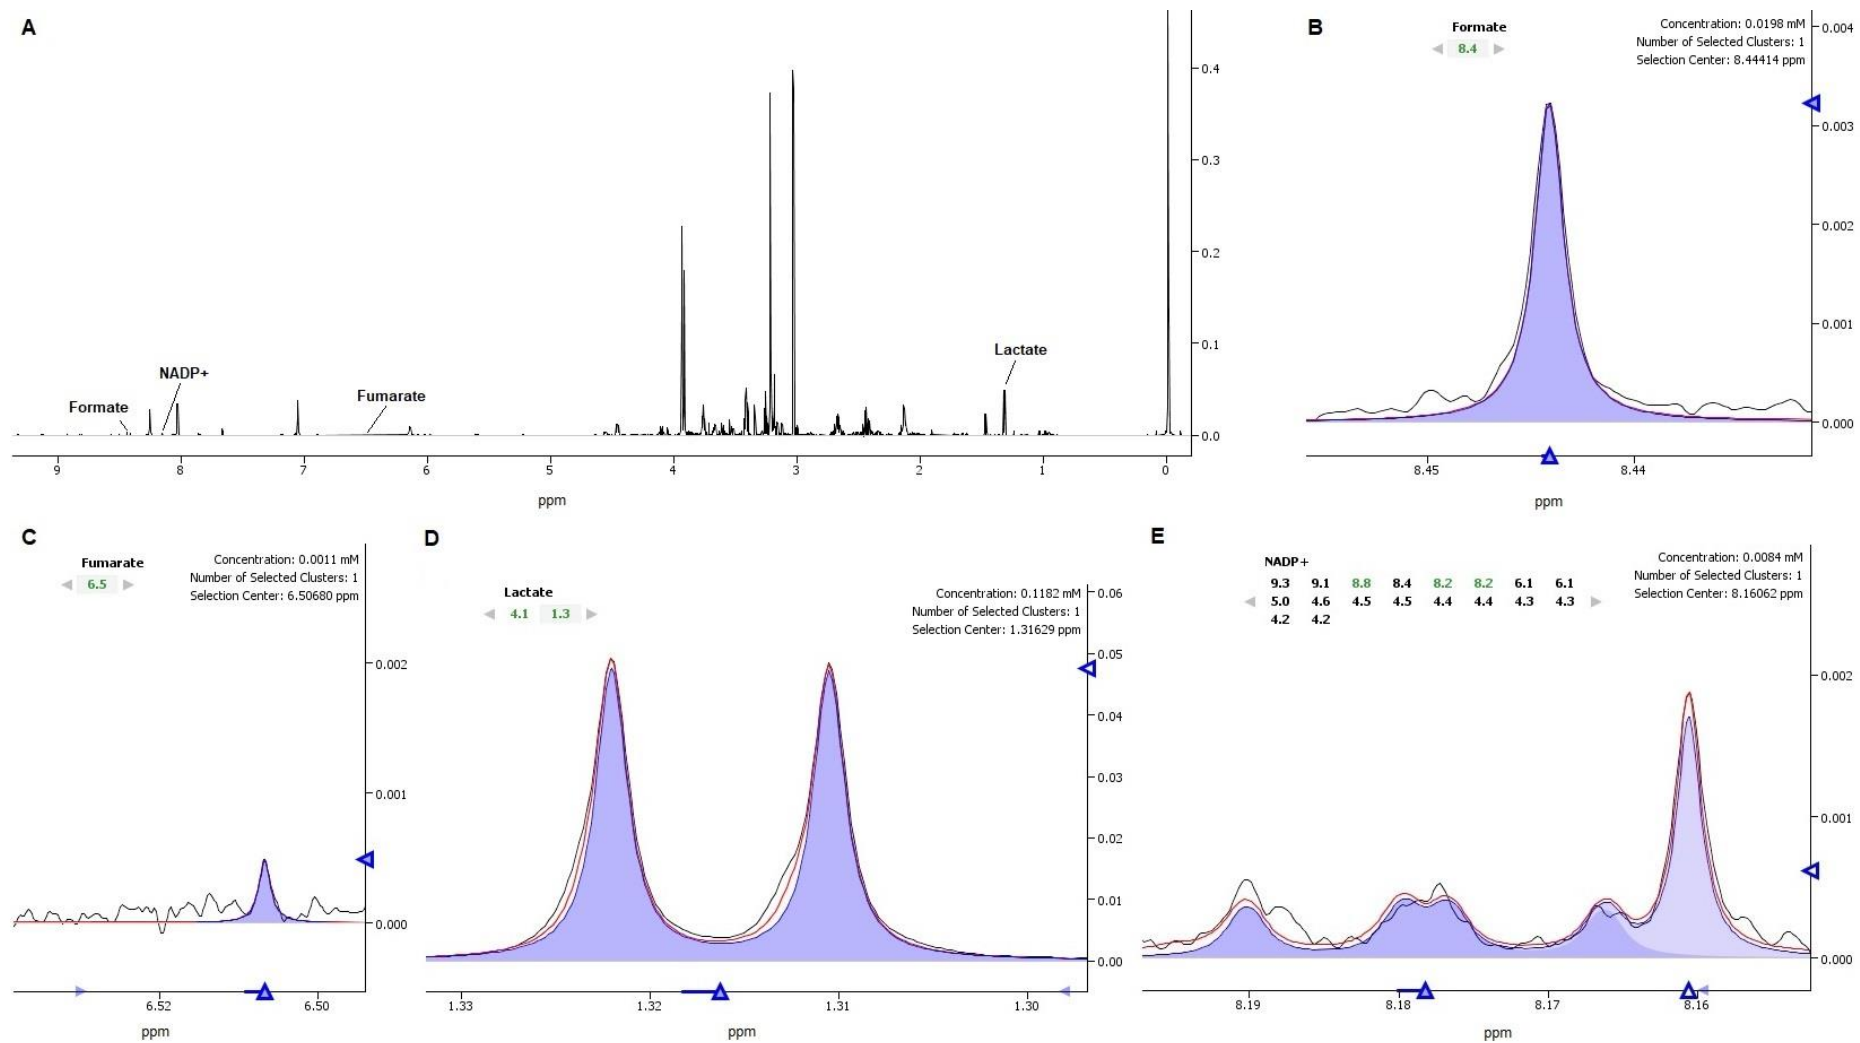

**Figure S2.** Representation of a skeletal muscle 1D  $^1\text{H}$ -NMR spectrum region where the main metabolites were quantified for a single participant. (A): Entire Spectrum; (B): Formate; (C): Fumarate; (D): Lactate; (E): NADP<sup>+</sup>.

**Table S1.** Summary of serum and skeletal muscle pathways related to iCRF.

| Biological Sample | Pathways                                   | Total | Expected | Hits | Raw p-values | -LOG(p) | P-values Ranking | FDR (q-values) | Impact | Decision |
|-------------------|--------------------------------------------|-------|----------|------|--------------|---------|------------------|----------------|--------|----------|
| Blood             | Aminoacyl-tRNA biosynthesis                | 48    | 0.3716   | 7    | 0.00000001   | 7.9093  | 1                | 0.0025         | 0.0000 | SIG      |
| Blood             | Glycine serine and threonine metabolism    | 33    | 0.2555   | 4    | 0.00007492   | 4.1254  | 2                | 0.0050         | 0.2961 | SIG      |
| Muscle            | Pyruvate metabolism                        | 22    | 0.1419   | 3    | 0.00027962   | 3.5534  | 3                | 0.0075         | 0.1446 | SIG      |
| Muscle            | Glyoxylate and dicarboxylate metabolism    | 32    | 0.2065   | 3    | 0.00087031   | 3.0603  | 4                | 0.0100         | 0.0000 | SIG      |
| Blood             | Alanine aspartate and glutamate metabolism | 28    | 0.2168   | 3    | 0.00104270   | 2.9818  | 5                | 0.0125         | 0.1138 | SIG      |
| Blood             | Valine leucine and isoleucine biosynthesis | 8     | 0.0619   | 2    | 0.00150000   | 2.8239  | 6                | 0.0150         | 0.0000 | SIG      |
| Muscle            | Arginine biosynthesis                      | 14    | 0.0903   | 2    | 0.00327270   | 2.4851  | 7                | 0.0175         | 0.1168 | SIG      |
| Blood             | Arginine biosynthesis                      | 14    | 0.1084   | 2    | 0.00475060   | 2.3233  | 8                | 0.0200         | 0.0609 | SIG      |
| Muscle            | Glutathione metabolism                     | 28    | 0.1807   | 2    | 0.01295300   | 1.8876  | 9                | 0.0225         | 0.0215 | SIG      |
| Muscle            | Alanine aspartate and glutamate metabolism | 28    | 0.1807   | 2    | 0.01295300   | 1.8876  | 10               | 0.0250         | 0.1995 | SIG      |
| Blood             | Glutathione metabolism                     | 28    | 0.2168   | 2    | 0.01857800   | 1.7310  | 11               | 0.0275         | 0.0887 | SIG      |
| Blood             | Glyoxylate and dicarboxylate metabolism    | 32    | 0.2477   | 2    | 0.02396100   | 1.6205  | 12               | 0.0300         | 0.1058 | SIG      |
| Blood             | Arginine and proline metabolism            | 38    | 0.2942   | 2    | 0.03309400   | 1.4802  | 13               | 0.0325         | 0.1884 | NS       |
| Muscle            | Nitrogen metabolism                        | 6     | 0.0387   | 1    | 0.03815100   | 1.4185  | 14               | 0.0350         | 0.0000 | NS       |
| Muscle            | D-Glutamine and D-glutamate metabolism     | 6     | 0.0387   | 1    | 0.03815100   | 1.4185  | 15               | 0.0375         | 0.5000 | NS       |
| Blood             | D-Glutamine and D-glutamate metabolism     | 6     | 0.0465   | 1    | 0.04563400   | 1.3407  | 16               | 0.0400         | 0.0000 | NS       |
| Blood             | Nitrogen metabolism                        | 6     | 0.0465   | 1    | 0.04563400   | 1.3407  | 17               | 0.0425         | 0.0000 | NS       |
| Muscle            | Taurine and hypotaurine metabolism         | 8     | 0.0516   | 1    | 0.05057400   | 1.2961  | 18               | 0.0450         | 0.4286 | NS       |
| Muscle            | Butanoate metabolism                       | 15    | 0.0968   | 1    | 0.09292500   | 1.0319  | 19               | 0.0475         | 0.0000 | NS       |
| Muscle            | Nicotinate and nicotinamide metabolism     | 15    | 0.0968   | 1    | 0.09292500   | 1.0319  | 20               | 0.0500         | 0.0000 | NS       |
| Muscle            | Histidine metabolism                       | 16    | 0.1032   | 1    | 0.09883400   | 1.0051  | 21               | 0.0525         | 0.0000 | NS       |
| Blood             | Butanoate metabolism                       | 15    | 0.1161   | 1    | 0.11052000   | 0.9566  | 22               | 0.0550         | 0.0000 | NS       |
| Blood             | Histidine metabolism                       | 16    | 0.1239   | 1    | 0.11747000   | 0.9301  | 23               | 0.0575         | 0.2213 | NS       |
| Muscle            | Citrate cycle (TCA cycle)                  | 20    | 0.1290   | 1    | 0.12213000   | 0.9132  | 24               | 0.0600         | 0.0298 | NS       |
| Blood             | Pantothenate and CoA biosynthesis          | 19    | 0.1471   | 1    | 0.13803000   | 0.8600  | 25               | 0.0625         | 0.0000 | NS       |
| Blood             | Citrate cycle (TCA cycle)                  | 20    | 0.1548   | 1    | 0.14479000   | 0.8393  | 26               | 0.0650         | 0.0327 | NS       |

|        |                                           |    |        |   |            |        |    |        |        |    |
|--------|-------------------------------------------|----|--------|---|------------|--------|----|--------|--------|----|
| Blood  | beta-Alanine metabolism                   | 21 | 0.1626 | 1 | 0.15150000 | 0.8196 | 27 | 0.0675 | 0.0000 | NS |
| Muscle | Glycolysis/Gluconeogenesis                | 26 | 0.1677 | 1 | 0.15605000 | 0.8067 | 28 | 0.0700 | 0.0291 | NS |
| Blood  | Propanoate metabolism                     | 23 | 0.1781 | 1 | 0.16477000 | 0.7831 | 29 | 0.0725 | 0.0000 | NS |
| Muscle | Porphyrin and chlorophyll metabolism      | 30 | 0.1936 | 1 | 0.17801000 | 0.7496 | 30 | 0.0750 | 0.0000 | NS |
| Blood  | Porphyrin and chlorophyll metabolism      | 30 | 0.2323 | 1 | 0.20973000 | 0.6783 | 31 | 0.0775 | 0.0000 | NS |
| Muscle | Arginine and proline metabolism           | 38 | 0.2452 | 1 | 0.22038000 | 0.6568 | 32 | 0.0800 | 0.0860 | NS |
| Muscle | Tyrosine metabolism                       | 42 | 0.2710 | 1 | 0.24082000 | 0.6183 | 33 | 0.0825 | 0.0246 | NS |
| Blood  | Glycerophospholipid metabolism            | 36 | 0.2787 | 1 | 0.24649000 | 0.6082 | 34 | 0.0850 | 0.0258 | NS |
| Muscle | Primary bile acid biosynthesis            | 46 | 0.2968 | 1 | 0.26078000 | 0.5837 | 35 | 0.0875 | 0.0076 | NS |
| Blood  | Pyrimidine metabolism                     | 39 | 0.3019 | 1 | 0.26428000 | 0.5779 | 36 | 0.0900 | 0.0000 | NS |
| Blood  | Valine leucine and isoleucine degradation | 40 | 0.3097 | 1 | 0.27012000 | 0.5684 | 37 | 0.0925 | 0.0000 | NS |
| Muscle | Aminoacyl-tRNA biosynthesis               | 48 | 0.3097 | 1 | 0.27058000 | 0.5677 | 38 | 0.0950 | 0.0000 | NS |
| Blood  | Primary bile acid biosynthesis            | 46 | 0.3561 | 1 | 0.30429000 | 0.5167 | 39 | 0.0975 | 0.0076 | NS |
| Blood  | Purine metabolism                         | 65 | 0.5032 | 1 | 0.40307000 | 0.3946 | 40 | 0.1000 | 0.0000 | NS |

FDR: false discovery rate of 0.1. All identified pathways were ranked based on their p-values from smallest to largest. Then, the FDR values were calculated for each pathway (q), assuming  $q = (0.1 \times i) / m$ , where  $i$  denotes the  $i$ -th position of the pathway in the ranking of p-values (in the  $i$ -th row) and  $m$  the total number of ranked pathways. When the p-values of the pathways were less than the q-values, the pathway was declared to be significantly enriched; SIG: Significant pathway at the FDR level; NS: Non-significant pathway at the FRD level.
